# Supplementary material
Source: PubMed Central journal article supplement (PMC6286080)

◆ iFoldRNA    
 ■ MC-Sym    
 ▲ Rosetta    
 ◆ NAST

**Prediction of hairpins from sequence**

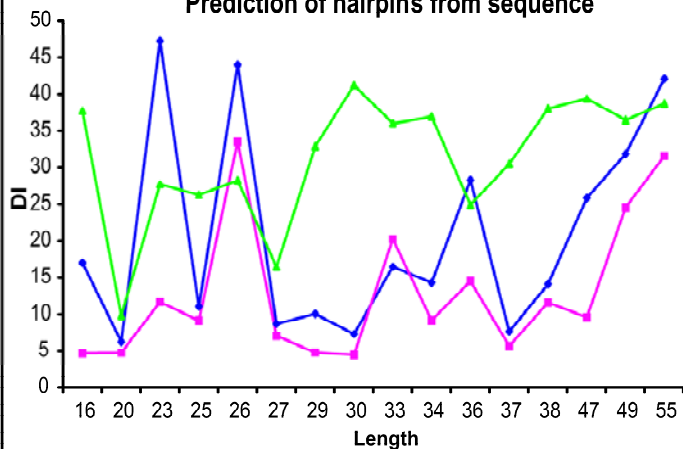

**Prediction of hairpins from secondary structure**

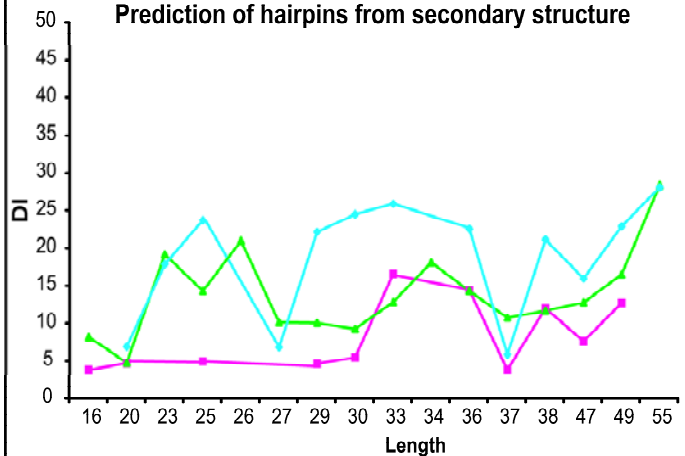

**Prediction of pseudoknots from sequence**

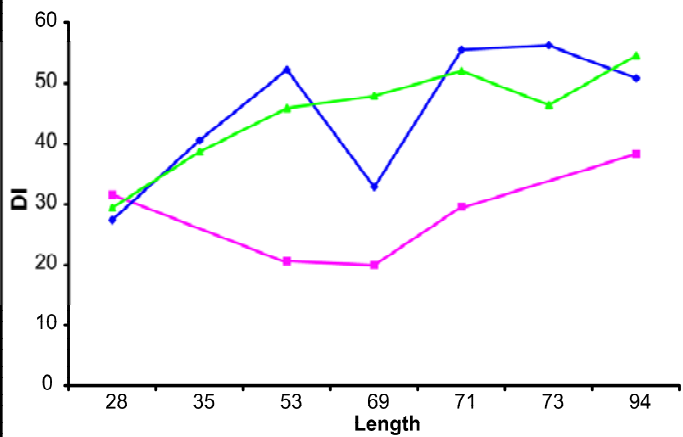

**Prediction of pseudoknots from secondary structure**

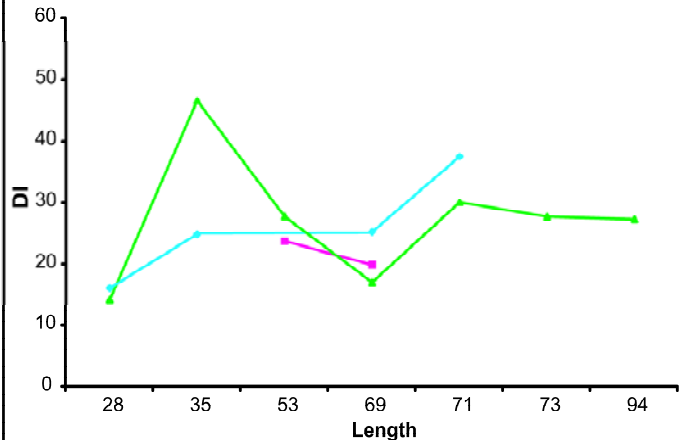

**Prediction of junctions from sequence**

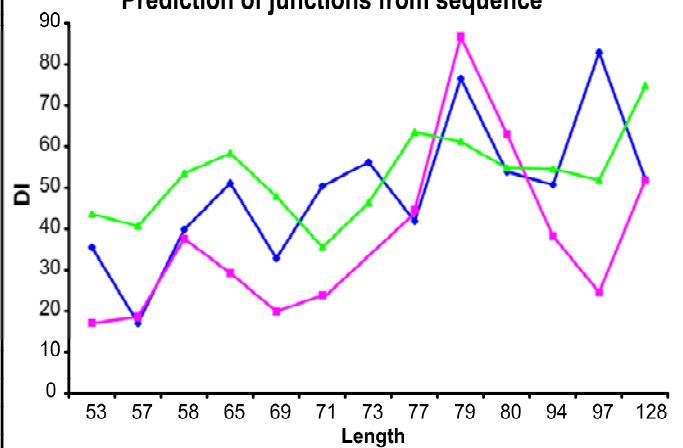

**Prediction of junctions from secondary structure**

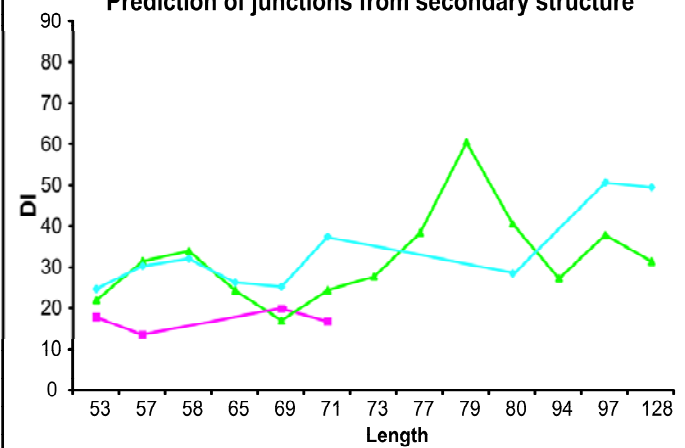

Supplement: NIHMS995397-supplement-S2.pdf [file NIHMS995397-supplement-S2.pdf]
